# Supplementary material
Source: Preprints.org preprint supplement (doi:10.20944/preprints202011.0643.v1)
Supplement: Supplementary file 4 [file supplementary]

## Sheet: Sheet1
Supplementary Table 1: List of 2815 gene ID altered in intestinal- and diffuse-type GC
MSL3P1
CKS1B
DDX27
GET4
CSE1L
TOMM34
YTHDF1
RAE1
PARD6B
MRGBP
C7ORF13
TPX2
CDK5RAP1
UBE2C
PDRG1
CPNE1
SPATA2
STAU1
HDGF
RAB5IF
OSER1
TAF4
ZNF695
DSCC1
E2F6
CERS2
TOP1
AUNIP
ATAD2
DSN1
SF3B4
MYBL2
TRIB3
MCM8
DKC1
TTI1
PSMA7
ILF2
GMEB2
UBE2Q1
SMYD5
UCKL1
MTBP
CENPQ
PIGU
TRMT6
OIP5
TMEM14A
RECQL4
DHX16
GID8
ADRM1
TMEM189
SLC35C2
EIF3B
TP53RK
AURKA
E2F1
HJURP
SMG5
NOL10
DPM1
GINS1
C17ORF53
DNAH14
GTPBP4
ERCC6L
EIF2S2
MCUR1
DHX34
RPN2
IGF2BP3
CDC25B
BCL2L1
ACTR5
GMNN
TRIP13
DNAAF5
DNAJB11
FOXM1
XPO5
TOP1P1
FOXA2
CKAP5
SKA3
FAM72B
ABCB6
CSTF1
EME1
KIF23
ABCF1
SNRPC
SLC25A33
TOP2A
RHPN1-AS1
EIF6
CENPL
CCDC86
ZMYND19
FAM72A
RELL2
BYSL
FLAD1
SMUG1
NEK2
SNHG17
TRAIP
NUF2
PIMREG
NFS1
TPD52L2
RFC3
RNF114
TDRKH
ZGPAT
C1ORF112
TROAP
AFDN-DT
SNRPB
MED20
CCT5
KIF18B
POLR1C
YWHAB
ARHGAP39
EFNA1
PABPC1L
SAPCD2
NOC2L
STIP1
RPRD1B
NHLRC1
ANLN
MAGEA3
PFDN2
FOXP4
WRNIP1
SLC1A5
RTF2
ABHD16B
NELFCD
PSMD11
GGT7
RNF32
TCF19
ATAD3A
NCOA6
HM13
CENPA
SLC3A2
ANAPC7
KIF18A
DDX56
SMG7
USP39
MTFR2
PRC1
CDCA5
TTK
CMSS1
ALG3
STIL
PNO1
ZSWIM1
BRAT1
TEX30
SLC35B1
STK35
B4GALT3
FAM72D
PSMD14
LRP11
YDJC
PDCD2L
MRTO4
KIF2C
BZW2
PSRC1
DDIAS
NANP
SNHG11
PRR7
ARFGAP1
CDKN2A
CLCN4
FKBPL
BRIX1
HIST1H2BN
RALY
FLVCR1
UBE2V1
TM9SF4
PLEKHG4
SNRPD1
TBCE
MTG2
GIT1
ABHD12
ESPN
BLCAP
TDRD5
TBC1D31
IQGAP3
PFDN4
ZC3H3
RPE
RAD54L
WDR62
ACOT8
ECE2
DTYMK
KIF4A
PAK1IP1
DAGLB
UBE2T
CDK1
IGF2BP2
RPP40
ACBD7
NSFL1C
HIST2H4A
TMEM41A
RIBC2
MCM10
NSUN2
DBF4B
SCAMP3
CCDC150
PSMB4
EIF2AK1
POLR2H
POLD2
LBX2-AS1
NXT1
CDC25C
BOP1
PSMG3
EDEM2
NCAPH
MELK
CENPI
CDK16
ECT2
CTNNBL1
MPLKIP
RFC4
COIL
CCT3
SERINC3
ACOT4
PPIL1
REXO4
BCAP31
NAA20
DCAF13
TAF11
ZNRD1
GPR19
TMEM201
CDCA8
UBQLN4
SUV39H2
ROMO1
CCDC43
PIGT
MRM2
TONSL
ADAP1
GPR89A
SNHG15
DARS2
RDM1
MGME1
KIF14
RACGAP1
MAGEA6
CNOT11
PRPF6
C5ORF34
DHRS13
UTP4
FASTKD3
ADGRG1
DAP3
BUB1
SMPD4
HSD17B7
ACTL6A
CCHCR1
GSS
ERAL1
MPP6
CLPTM1L
RAD54B
TMEM270
TAF1A
MAGEA2
MRPS18A
SPAG5
COASY
CDC20
VAPB
KIF3B
NCSTN
TOMM6
MRPL9
METTL1
ZNF165
MRPL14
CDC45
SMARCA2
EXO1
CCDC58
SUCO
TCF4
EFTUD2
HNF1A
NUFIP1
PDIA6
MTHFD1L
TRPC4AP
MASTL
RAD9A
FANCI
FAM136A
PKMYT1
AHCY
CCNB2
RPIA
NCL
DCUN1D5
SNRPA1
NOL4L
SLC50A1
SPC25
SASS6
GEMIN8P4
POGK
ZFP64
TSEN54
TMEM199
PNPT1
PSMD13
TMEM267
SURF2
CSAG3
PRMT2
PIGW
TRAF4
ANKEF1
NOP56
PLK1
ZNF473
HMGB3
ZWINT
ATP13A3
OGFR
FANCA
HSPA14
PSMB3
GPN1
HSPD1
PIP4K2C
PAFAH1B3
MORC2
CLCN2
C1ORF35
FOXK2
SLC52A3
FBXO45
MAIP1
TICRR
ESPL1
PPM1G
RAD51AP1
PUSL1
PLSCR2
HSP90AB1
GABRR1
NCAPG2
MSTO1
DDX31
NUDCD1
TUBG1
TSACC
RTKN
CENPN
SDC4
SRCIN1
GNGT1
RAB17
PSMD2
KIF4B
MZT1
PDZD7
FAM50A
KNSTRN
PSME3
ATAD3B
FIGNL1
FOXD2-AS1
PSAT1
CENPS
COX19
CNKSR1
JMJD4
SGO1
LAGE3
C1ORF109
WIPI2
E2F7
SLC25A22
MOCS3
APMAP
LIG3
CGN
PROSER1
CNOT3
RAP1GAP
TMEM97
MCM3
DNA2
IPO9
PUS1
DTL
IRAK1
SPERT
TMEM185B
GMPS
POU6F2
CDCA3
FAM91A1
GCLM
PIGM
IFT52
C1ORF159
ATXN7L3
PSMF1
SUZ12
NUDT1
RMI2
ARRDC1
NDC80
TIGD3
ENOPH1
POLE2
RCC2
KIF22
PPFIA3
EXOSC5
RMND5A
GGH
WASF2
CENPW
KIF24
TBRG4
WDR43
MEN1
GGCT
E2F3
RAD1
LEMD2
UQCC2
SPINT2
ABHD16A
CIP2A
NIT2
PSMD4
NSUN5
CSNK2A1
LSG1
SPIRE2
SRXN1
CSAG1
WDR5
F11R
PCNA
NIF3L1
SNHG1
LRRC45
NME1
NGDN
RHEBL1
ATIC
PRCC
POLR3F
YKT6
LOC399815
POFUT1
TMEM38B
SMG6
ETV4
SKP2
FGFR1OP
VEGFA
SGO2
MMS22L
SET
EPB41L1
MAGEA12
EHMT2
DNTTIP1
SNRK
CENPO
TRIM15
PYCR3
SQLE
LOC148709
NKRF
LYAR
EFCAB11
HSF2BP
LSM5
RFC2
ERGIC3
CHEK2
LRRC1
PPFIA1
C2ORF15
MAD2L1BP
ZCCHC3
RBM39
SLC25A39
HAUS7
TOP1MT
GTPBP2
LAPTM4B
G6PD
PARPBP
CLDN4
UMPS
POLQ
CEP55
RRNAD1
VPS72
PRELID3B
SLC52A2
NOL11
XRCC2
RUVBL2
CSTF2
C1ORF43
MED30
HIST1H2AE
BCCIP
RFC5
JPT2
TIMM50
ZDHHC9
SENP2
DXO
DLEU1
NFE2L3
RNF208
NIFK
PIGC
IL22RA1
TTLL4
PAX8
CAMKMT
KIN
GLO1
ELF3
PCID2
MAPKAPK5
ZFYVE1
NUDT16P1
HOXC13
PCGF2
KAT2A
RPP38
SYNE4
SFT2D3
RASSF7
NUP37
MAD2L1
ZSWIM3
DNMT3B
SYT7
SLC39A10
GTF3C5
NUDT5
CRNKL1
PSMB2
CCDC87
SCARB1
PDIA4
MUTYH
PA2G4
POLDIP2
PSMC4
ULBP1
VBP1
RUVBL1
LIN9
HIST1H2AM
NDRG3
C5ORF22
MAGIX
TRIM11
SINHCAF
CD3EAP
ZNF131
TMEM182
SPATA33
SPANXC
WDR53
MOGS
KIFC1
LARP4
LRP5
SEPHS1
MRPS23
ATAD5
NKD2
MRPS10
CHKA
NEU1
CCZ1P-OR7E38P
ACP1
CBX3
PDE11A
SPNS1
LOC148413
FBXL17
NR2C2AP
RBM28
ITPA
BLOC1S3
CKAP2
CTSO
CCNE2
DLEU2
RRP36
PPP1R3D
CXORF36
LAS1L
MAFG-DT
WDR34
CCT6A
HPDL
TTC28
NELFE
DDX10
PFDN6
NAA40
NAA25
POLE3
KPTN
ATAT1
BORA
CACYBP
SPDL1
RAD21
XPOT
EPOP
RBCK1
PUS7
GNL2
HDAC2
HNF4A
CENPBD1
RAD51
ARHGAP31
TEDC2
DEPDC1
SLC25A15
HOXC10
CBARP
DDX47
C8ORF76
NKPD1
HSP90B1
MRPS18B
UBAP2L
ENPP5
SNRPF
SSRP1
TMEM41B
UBA2
TMEM216
SLC9A8
SH3BP5
MSN
HGH1
RPA3
PAIP1
MRPL48
BIRC5
CHTF18
ADCY4
SLC5A6
IPO4
PSMB1
RPP21
ATP6AP1
BRCA1
PSEN2
TFDP1
SSB
IL17RB
IGSF9
LINC01558
BUB1B
CAMSAP3
MFSD2B
DNAJC5
C12ORF56
SHE
NUP155
KPNA2
BCL2L12
NABP2
XPO1
TTPAL
SLC12A7
ESF1
CLDN3
ARFGEF2
UXS1
MSH2
SMNDC1
FOXJ1
GTF2H4
TLE4
NUP62CL
TXNDC12
ASPM
TIMELESS
PSPH
TRAF2
TOMM40
LSM4
MED25
MKKS
MCM2
NAT9
KDELR2
DOLPP1
CNRIP1
TCP1
TUBB4B
HOOK1
WDR72
SAMD10
TIGD1
DDR1
RNASEH2A
POLR3E
PCLAF
BUD23
RSRC1
SS18L1
TIMM8A
CYYR1
BCAT2
PCYT2
CTPS1
RPN1
SMYD2
RRP9
PSMB7
CAMTA2
COA6
STK3
HOXC6
CHD3
DHX35
DBF4
RTN3
S1PR1
MMRN2
ARHGAP24
MRPL3
NUP107
KDF1
TMPO
ABCC2
ZEB2
KRTAP4-1
UTP6
PRRG2
TRIM10
SLC35A2
STK31
ENTPD1
TRIT1
WDR75
IFFO1
TTC30B
ZNF217
AAR2
RCC1
TMTC4
SNRPG
LZTS3
MAPRE1
WDR74
STMN1
EIPR1
PCIF1
C4ORF3
DPH6
PLOD3
CMTM8
GPATCH1
CCNB1
STRN4
JAM2
CIAO1
FAAP24
NLE1
UBL4A
GPR158
PQLC2
CD2AP
TEK
PRPF4
KIF15
CUL4A
SEZ6L2
RIPK2
MRPL13
ANAPC11
TUBA1C
CKAP2L
SELENOI
TSN
RIPPLY3
FAM114A2
GINS2
WDR12
AUP1
TMEM9
ZBTB9
SEH1L
MAGOH
TARDBP
TESMIN
PTEN
PRMT3
KIAA0895
FAR2P1
SUMO1
TMEM14B
RASAL2-AS1
RECK
TLCD1
CPSF3
PLK4
BEND3
FBXO5
TMEM62
EMC8
C12ORF73
KLHL17
LTBR
NISCH
ASF1B
FAM24B
COMMD7
FAM155B
PPP5C
SELP
TMEM206
CSNK2B
EMG1
TAZ
LSM14B
MRPL45
TOB2P1
BRMS1
CHML
WDR77
NUSAP1
ITPR1
RRBP1
ARF1
ERBB3
AMMECR1
NDUFAF6
PLEKHG6
RBM17
DNAJC2
FANCB
TMEM198
C2ORF48
TPRN
RUNX1T1
NAXE
MYO7A
GABPB1
TOX3
SCN4B
KANK3
URB2
PIR
ARHGAP11A
RALGAPB
CLK2
PDIA3P1
CLPB
HIST1H2BD
RIN3
LINC01106
HGS
DDX18
PTGES3
GPS1
PROSER2
GIMAP8
DSCR8
ACSF2
SARS2
TEFM
TEAD4
CENPH
GPATCH4
FAM241B
ZNF671
MCM4
AFDN
LSR
MCC
SNX29
WDHD1
FOXE3
VSTM4
MRPL36
VPS16
F5
HSPA5
THNSL1
FAM199X
PLEKHG5
WDR93
ABHD3
DGAT2
ZNF692
UBE2S
HIST1H2BG
TP53I13
CHORDC1
DIAPH3
CIT
PSMC3IP
LARP4B
ORC6
PDIA3
GIT2
SPRTN
TNS2
PNPO
HIST1H3B
AURKAPS1
RFWD3
CBWD3
CYP2U1
FANCE
ARHGEF19
GARS
LIX1L
TAP1
TGDS
POU6F1
AURKB
HSPE1
SLC25A44
DLX6-AS1
SCAMP5
CCT4
GLTPD2
DPH7
SETDB1
BCS1L
MXD4
RPS21
GTF3C2
SCNM1
MFSD13A
CDC25A
NFYA
GPR162
USHBP1
SEC23B
LEKR1
HEG1
CEBPA-DT
ODF2
HOXA1
WDR7
MAP3K3
RCBTB2
AAMP
ERG
TMEM105
DNAJC9
DELE1
MTHFD2
FAM160B2
HEATR1
TSPAN11
DNAJC7
A2M
RPL39L
SOX9
EMC1
MORC2-AS1
TARS
USP14
YRDC
GTF3A
CCNF
CHD9
PAFAH1B1
EXOSC2
HOXC11
WDSUB1
UNG
LRRC46
SYNPO
MYO19
SECISBP2L
METTL13
SF3B3
LINC01816
C1ORF53
METTL7A
SNRPE
TRIM27
SMC4
CLNS1A
HIST1H3H
SGCB
DCLRE1A
DGLUCY
KNOP1
CENPX
LOC100134868
LHFPL6
AP5Z1
TTC3
DLGAP5
THSD1
INTS7
TTC26
LDLRAD4
YWHAG
XPR1
NFKBIB
FAH
AJUBA
SART3
MARF1
ZC3H15
TK1
NFIB
EBNA1BP2
OXLD1
SLC17A9
MLXIPL
TAF2
SORD
CCT7
PLAGL2
TARS2
SNTB1
MANEAL
ALG1L
NSDHL
TPM3P9
RSPH14
CLEC14A
CEP72
COL4A3BP
ZNF135
CYB5B
SRR
ELAC1
TMEM74B
ENOX2
TFB2M
GPR180
PCGF1
TASP1
TFAP4
EBPL
PAPLN
TBC1D7
DPH2
DHCR7
BID
NR3C1
PRMT5
HSPH1
DNAJA3
CAMK2N1
ADNP
GIMAP6
TMEM273
PHLDB1
PAK4
CBX4
PRPF3
MRPL55
GAS7
FBXO2
ST8SIA1
WDR82
FANCF
TICAM2
TMEM234
GRB14
ANKRD46
ATP8B2
NPLOC4
CCM2L
ACKR1
FAM174B
SFMBT1
TDG
TMEM177
ADIPOR1
MYCT1
GPR143
HIST2H2BF
EMCN
MRPS5
C2CD4D
PTPRM
C6ORF222
ZNF239
HIST1H2BL
GTSE1
STAMBP
GEMIN6
SLC35B2
MRPL2
POP1
ATP11A
NUP85
PDCD5
TMEM184A
TSPAN6
ZNF280A
LNX2
BAG6
SPINDOC
INTS14
CLIC2
MAPK13
PTCD1
SYS1
MAPK10
LRRC56
CCNI
GAL3ST1
ZWILCH
YES1
LRWD1
ADAM19
MEX3A
DLG4
ZMYND8
MAP3K12
ZNF521
TEX261
SPOUT1
GLT8D2
ACTR3B
TEDC1
POR
HMGA1
RHPN2
PEX10
SLCO4A1
FKBP4
ARL6IP5
MAD2L2
HIST1H3F
ADAMTS10
PRKACB
PLEKHO2
MEOX1
PRIM2
PRR19
NRDC
PYGO2
TGIF2
PYCR2
RHPN1
HTR2C
NCEH1
LMNB2
HELQ
HOXC8
SLC25A43
PKNOX2
FAM206A
ZNF133
MAP3K11
RANBP1
ST6GALNAC6
HAT1
TTF2
CDC123
PSMD3
FBXO22-AS1
AGPAT2
UBE2G2
GYPC
UQCC1
ZNF408
LMAN2L
NDUFS6
EMILIN1
FBXL5
QKI
ATP9A
YY1
HIST1H2BH
MITF
TXNRD2
GPATCH2
UCHL5
PIP5K1A
PLEKHB1
PAM16
SPSB2
WRAP73
SDF2
OSBPL2
KIF20A
TM9SF1
SMOX
COP1
TCFL5
RHOJ
CRTAP
TOPBP1
TNFRSF25
DUS1L
AZGP1
DEK
C8ORF33
PHKG2
KBTBD2
NR1D1
MAP7
EXOSC8
FOXN3
CENPF
ADD1
PROC
MPHOSPH10
VPS52
ZNF436
CTTN
HIST2H2BE
PIGA
SMC1B
RHBDD2
PRKCZ
VSIG10
ARHGEF5
FAM222A-AS1
C11ORF52
JADE3
NRIP2
HIP1R
LOC646762
CDC5L
EFNA4
NAA10
ZNF367
SLC25A19
LDB2
QSOX2
DNAJC18
TXNDC15
HIST1H2AK
AKAP2
ZNF28
SAC3D1
REXO5
DDX54
HELZ2
GTF2IRD1
DUS4L
HCN3
SCML1
GPN3
CLIC1
MATN2
PABPC5
BAMBI
CLEC1A
FOXRED2
NLGN2
ZCCHC24
HACD4
TFAM
CDK4
FAM110D
DBNDD1
CHTOP
CAPN10
INAVA
POLA2
CLN6
FAM13C
OPN3
USP42
TLL1
VAX2
AIFM3
ASPHD1
EVC
APTX
COA4
PECAM1
FBL
NOMO3
PUF60
MRPS26
PPDPF
ZFAND2B
CHDH
TIMM10
CTSA
C6ORF132
PLEKHA6
NOC4L
MAPK8IP2
LSAMP
E2F5
CD46
KHDC4
SLC5A12
ZDHHC23
BRD9
EVA1A
IARS2
MARS2
LARGE2
FANCG
PAQR4
YAE1D1
NUP58
SLC9A9
RBMS3
PSMA1
EEF2
FTSJ1
PCMTD2
C1RL
HIST1H4H
LRRC42
SLBP
HNRNPA2B1
ST7L
OLA1
WBP1L
RAC3
ULBP2
CLPTM1
DDOST
PCSK6
SCAND1
ARL6IP6
BCL2
FAM71E1
ZSWIM6
ARHGEF6
NDN
ARHGEF35
ARHGEF15
IDH3B
RIOK1
DCHS1
ZNF385D
COPZ1
TMEM106C
KPNA7
SPR
SPINT1
MAP4
MNX1
RTKN2
TCOF1
CENPE
ZBTB4
FBXL7
GUCY1A1
CIRBP
THOC3
RBFOX2
PPM1F
ZNF454
CELF2
KDM1A
BHLHE22
TGFBR2
DLX6
TCAM1P
TNFAIP8
CCNA2
UQCC3
ALG8
NCAPG
GSN
C16ORF45
ZNF677
RPP25
AIMP2
UTP14A
EBF3
TPRA1
HYOU1
ABCC10
TADA1
APC
DNPEP
HOXC9
EEF1E1
IGF2BP1
CEBPG
CEP68
POMGNT1
TMUB2
PIGO
RCOR2
CHCHD7
WDR3
ZNF335
C2ORF68
RAMMET
NFIC
MSX2
ZBTB47
ZNF575
DCDC2
B3GALT6
SLC39A4
TRIM28
NR2F1-AS1
EBP
ITPKA
DGUOK
ZNF468
MEA1
NOP58
HGSNAT
TSPO2
C1QTNF12
PIPSL
SMAD4
C1S
CYB5D2
PCSK1N
HIST3H2BB
METTL7B
SFT2D1
FAM86JP
ZNF572
E2F4
MAGEA11
GSTO2
MTHFS
HELLS
NATD1
SYT15
BATF2
TAX1BP1
RPL7L1
QTRT2
PAM
MDFIC
LMTK3
PPP1R11
PRR5-ARHGAP8
NUP35
ESCO1
PALM2-AKAP2
ZNF687
GAS2L3
TPRKB
FAM110A
GAB3
ATG2A
KIF21A
LTBP4
ALDH1A1
C1ORF226
PA2G4P4
LAMB2
SLC39A1
ETV7
SYDE1
GUCY1B1
PSMA6
TOB1
PLEKHA8
MPRIP
CCNE1
G6PC3
HTATIP2
HIST2H2AA3
PC
ZNF761
NLK
HIST1H1C
AFAP1
MRPL24
SPG21
RNF40
KLHL35
TSPAN13
MRPL11
SLC26A1
TACC3
RPL13P5
TMEM8A
AHCTF1
KCND3
SRPK1
AZIN1
CHMP7
DISP2
ESM1
TRAP1
DIABLO
HSPA12B
WDR46
NEURL1B
ZBTB42
STX3
ZNF366
ISG20L2
PRIM1
GDAP1
DUSP12
TTC30A
ARHGAP11B
LTBP1
MESP2
TAF5
DCXR
SPATA17
MAGT1
LPAR1
FAM49A
HARBI1
PRB3
CCND1
ITIH5
SBK1
PARP2
CCDC77
GNB4
RCN2
ABHD11
MDC1
HSPBP1
NEK1
DDX11
CTU1
SLC35F5
USP4
FANCL
SUPV3L1
LRRK2
UBAC2
PRPH2
TSPYL1
IGSF8
PGP
CKS2
ATG13
TFR2
FAM13B
RITA1
YIPF3
ERF
MARS
SCRIB
SPON1
VIM
SLC37A4
HES1
NICN1
RBM43
FOXQ1
DPM2
DUSP22
ZNF579
THOC1
ZW10
CSTF3
PDCD6
HAX1
ADPRM
IRF3
MUC13
ZNF598
PIK3CB
TTC4
ZNF407
BNC2
CHMP4B
PATL1
FRY
GAD1
ALG11
OSBP2
LHFPL3
ABRAXAS1
CDT1
LYG1
MKS1
C1R
HIST1H4D
LRRC70
RBM8A
GPRC5C
EPCAM
DPY30
ICA1
MRPS12
EEF1A1
SYNJ2BP
PIF1
MDH2
ANKS6
NIP7
KLC4
KCMF1
POLR1B
VPS25
SRSF10
RAB3IP
GTF2F2
LPIN3
MCTP1
ANP32A
RABEP1
LINC01003
MORF4L2
TLDC2
SNX1
AK2
PEAK1
PGAP2
AARS2
MTX1
CCT2
AARS
APOBEC3B
PYCR1
KIAA1549
TDRD10
TSEN34
COL6A2
SSPN
ENTPD6
CCDC137
RANGAP1
ALYREF
URI1
MYLK2
ZNF582
SCN2B
ALOX12P2
YARS
YOD1
NLGN3
PCDHGB7
ERG28
CABP4
MRAS
TFG
GPR183
PRPF40A
RASIP1
ABCA8
KIF11
ZNF423
CYP27B1
CEP83
TUT1
DLC1
PSMB5
SSBP2
GFM1
PMPCA
CCDC138
CPSF4
PHF21A
DENR
IGIP
NOL6
ADAM33
ABCA1
GRINA
SP8
MED10
FAM124B
DDX49
MARK2
GNG11
SSU72
INTS1
NPM3
PDE1A
TMEM223
HSD17B3
ATP6V1C1
NPR2
GRTP1
FAM83H
TXNRD1
FAM47E
DCN
HAUS5
TXLNB
TMEM39A
MICU3
MYO5A
E2F8
NEMP1
HACD3
RIC1
HDDC3
UPF3B
RNPEP
RASA3
FAM86C1
ATP13A2
HIST1H2BK
CCSAP
C1QTNF2
SLC4A1AP
FLI1
CNTN4
SNRPN
JRKL
TARBP1
WWC1
PRPF40B
SSNA1
CDK2AP2
SNED1
COA7
DNALI1
NPAS2
PSMC2
MALSU1
PHLDA3
TSFM
ZNF664
TNRC6B
CCDC178
PDP1
DROSHA
C8ORF82
PTGES2
MIR99AHG
LOC401463
CYBRD1
TARBP2
KNTC1
VPS26A
HIST1H4E
CDH5
LTV1
C1ORF174
SH3BGRL
DENND2A
ABCB9
TMC7
SETBP1
U2SURP
GATA2
PRDX1
RBBP8
LRRN4CL
VPS26C
GXYLT1
PEX7
FGFR4
FAM151B
UFSP2
SH2D3C
FAM111B
COG2
ABCF3
HIST1H2BC
PRR15
EXOSC10
ZMAT3
STAT5A
PRKCB
SMC2
FUT1
CYLD
MAL2
POLR3C
ZNHIT3
NXPE3
C10ORF88
CPQ
CRIPT
SYNE1
GGTA1P
GRHL2
NFATC4
KIF20B
TYMS
RCE1
HIST1H2AG
ATG4B
LRRC59
DZIP1
MRM1
PWAR5
NUP160
SRD5A1
CCDC24
SMIM1
ADGRA2
SEMA3G
PJA2
NIN
HERC1
ACTR3C
HSF1
C21ORF91
ORC4
FAM114A1
CNPY2
MCMDC2
SYT11
MCM6
PCP2
PTBP1
VARS2
PAXIP1-AS2
MKI67
IMMP1L
CCDC167
AVL9
OGN
SUN1
HSPB2
VPS39
FZD4
PPP2R5D
CBR4
RRP12
NOP2
GNG7
CDCA7
TTYH3
TMEM99
TMEM63B
MPDZ
RCSD1
FIBIN
TNFRSF21
FAM107A
MPHOSPH6
CYSLTR1
RAMP3
HNRNPF
ASPA
SALL4
CSF2RB
BDH2
LY6K
JAK1
FAT4
PDE4B
LAMB3
COL15A1
ARHGEF9
EVC2
SF3B6
MAGEF1
DEPDC1B
KLHDC3
GCSH
ANXA9
CLPSL1
MRPS15
VARS
CLDN9
TIAM2
NAP1L3
CDC6
CCDC34
KLF12
FAM172A
NEK3
HMBOX1
NOLC1
MMAB
NUTF2
ZFP82
C17ORF51
PDE7B
C1GALT1
ARL10
COL14A1
CORO1B
SUFU
PLEKHA2
MCM7
CCDC89
ACP6
PDCD2
LMF1
PCDH18
TBC1D10B
SLC44A5
GRAMD2A
MTFR1
MTERF3
ZNF333
ANXA6
GIMAP7
FKBP1A
EPS8L2
GRB7
UGT8
TPM3
ANP32E
STARD8
MDGA1
IDH1
NUP43
NDC1
FOXD2
REM1
PSMA2
KCNT2
IFRD1
KPNB1
TALDO1
FNBP1
DOLK
MROH8
XPC
CCDC142
CSNK2A3
MMRN1
ARHGEF3
ELF4
SLC33A1
UFM1
PPME1
ODF3L2
PRDM2
MGP
CTAGE9
EVL
DNAJA1
ARHGEF16
METTL27
FMNL3
TET3
CDO1
ANGPTL2
IRF2
TCF21
PODN
POLR2J
GTF3C3
ACOXL
RRP1
PDE5A
RNPS1
PPAT
SKIV2L
CDKN3
CAVIN1
LINC01140
DDRGK1
PRR34
SRSF6
CEP85
GLI1
NFIX
PRR11
LSM12
SUMO1P3
MED24
COLEC12
C2CD2
HMMR
[truncated: 816 more rows]
